# Supplementary material for: Copper salt of a DABCO-based molten salt: a high-performance catalyst in the one-pot synthesis of 3,4-dihydropyrimidine and polyhydroquinoline derivatives
Source: Royal Society of Chemistry journal article supplement (doi:10.1039/d3ra07366a), 2023-01-01

## Supporting Information

### **Copper salt of a DABCO-based molten salt: A high-performance catalyst in the one-pot synthesis of 3,4-dihydropyrimidine and polyhydroquinoline derivatives**

Neamatullah Fekrat, Masoumeh Mazloumi and Farhad Shirini\*

\*Department of Chemistry, College of Sciences, University of Guilan, Rasht, 41335-19141, Iran. E-mail: shirini@guilan.ac.ir; Fax: +98 131 3233262; Tel: +981313233262.

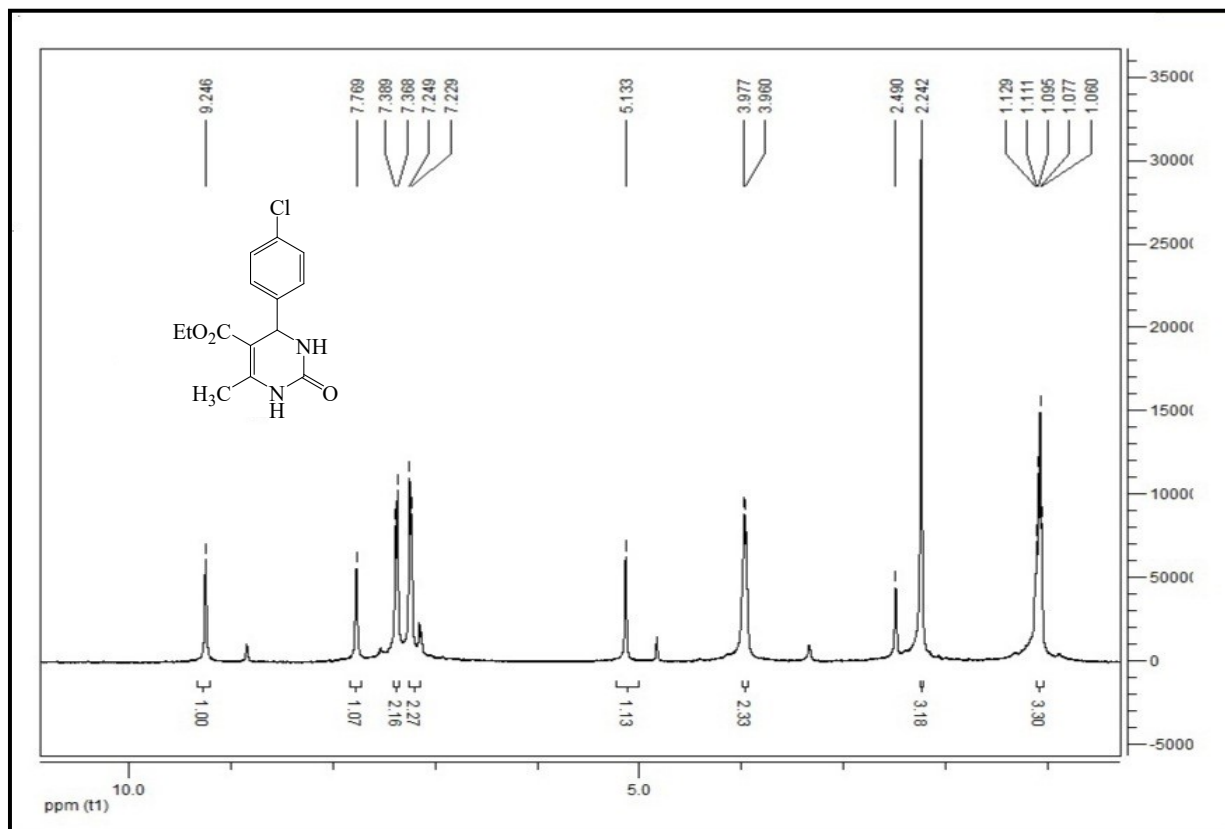

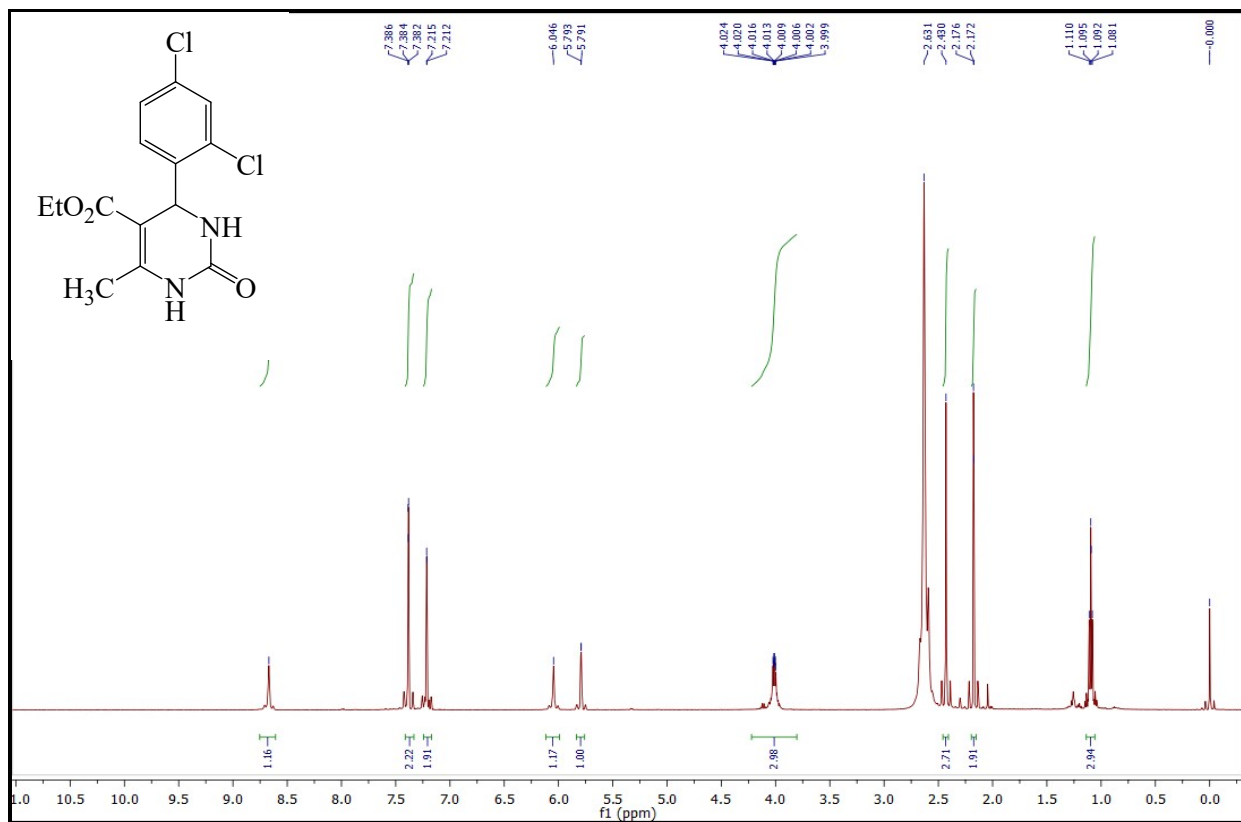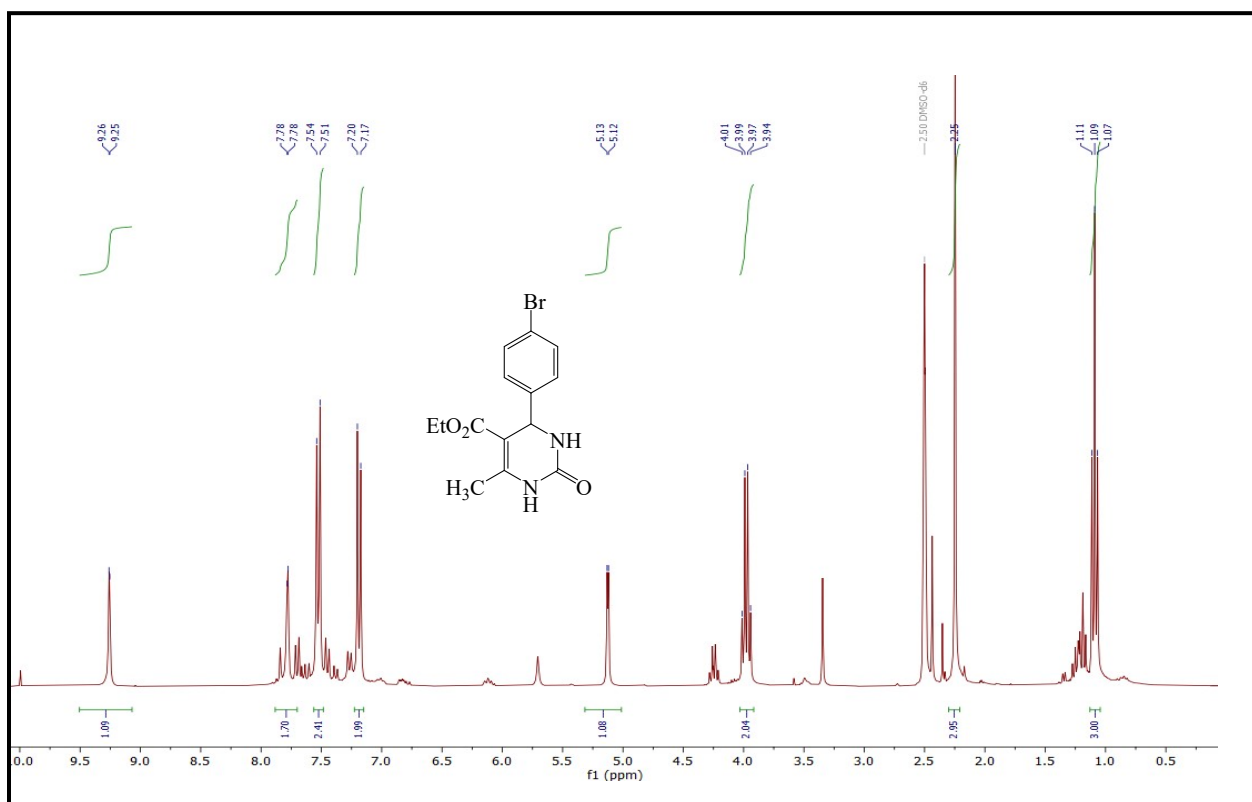

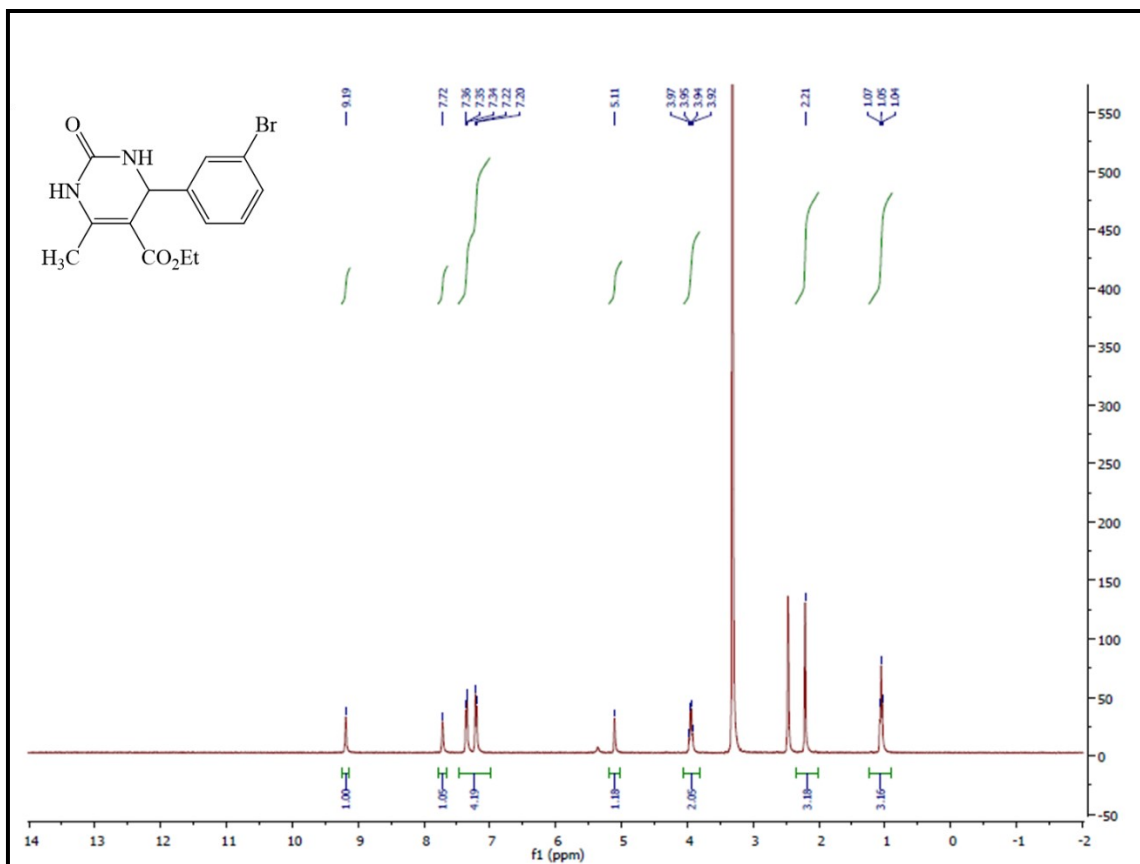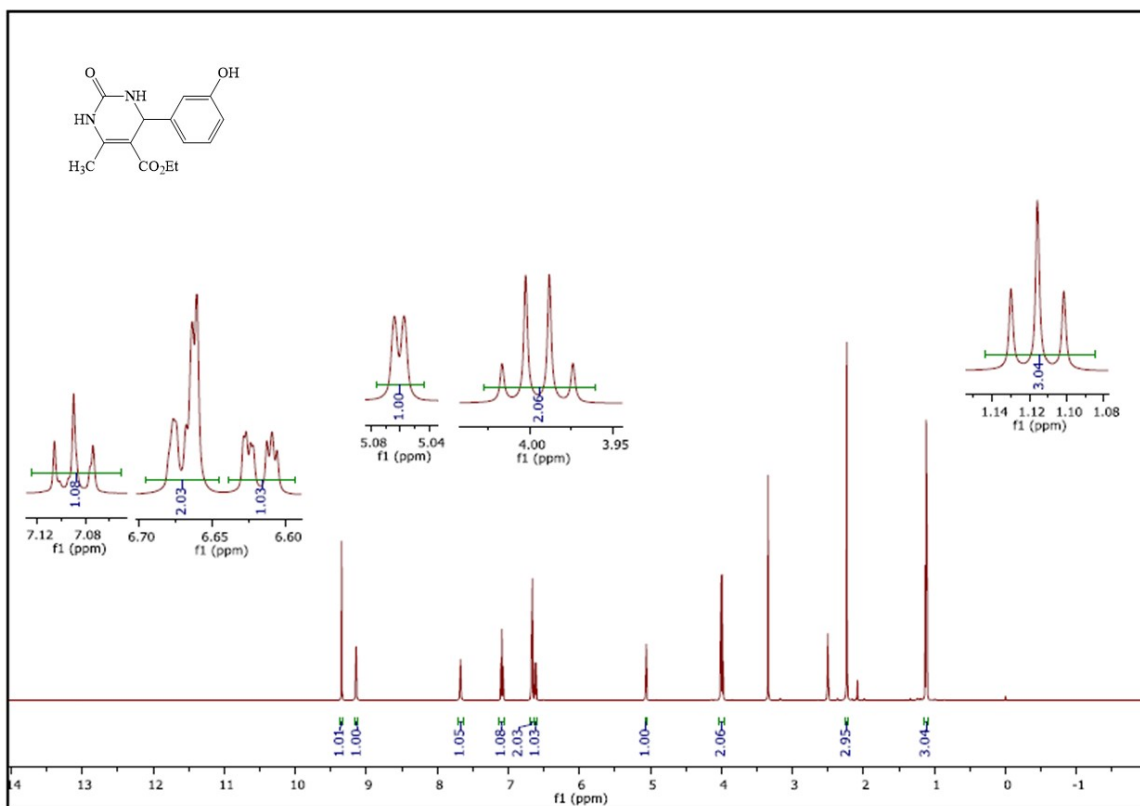

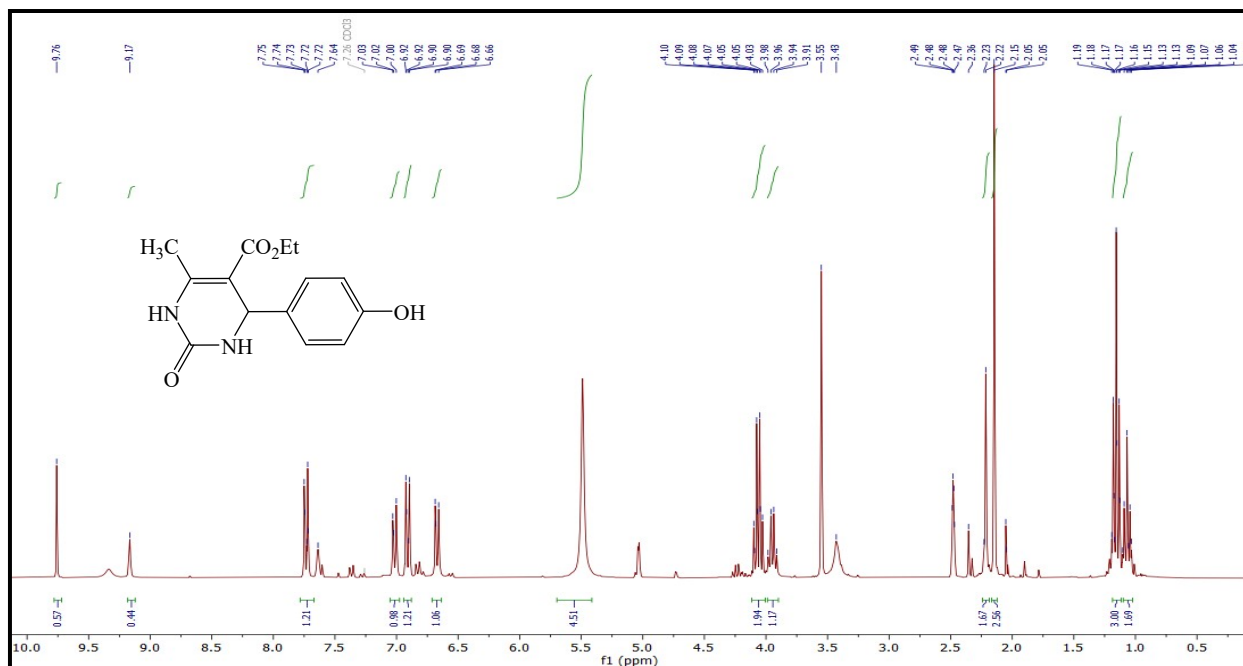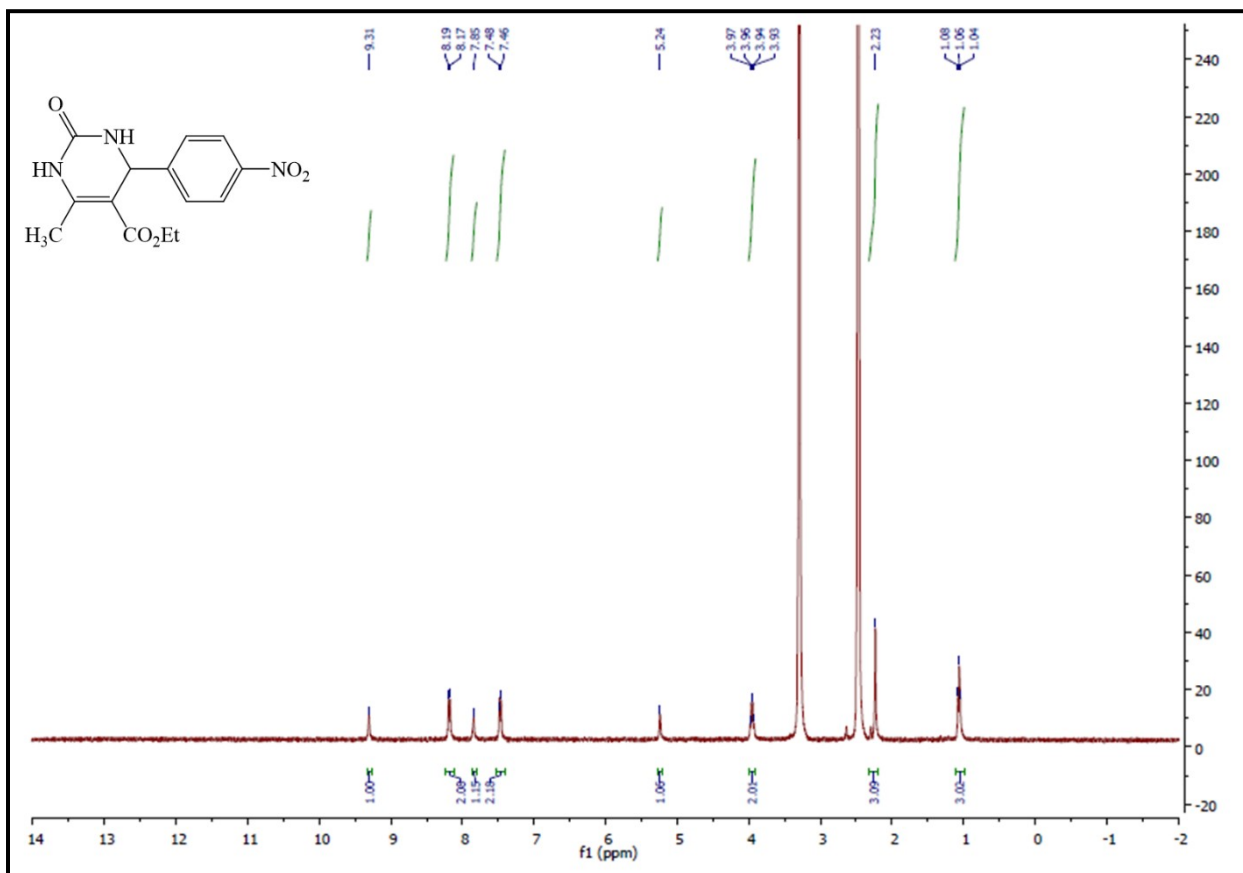

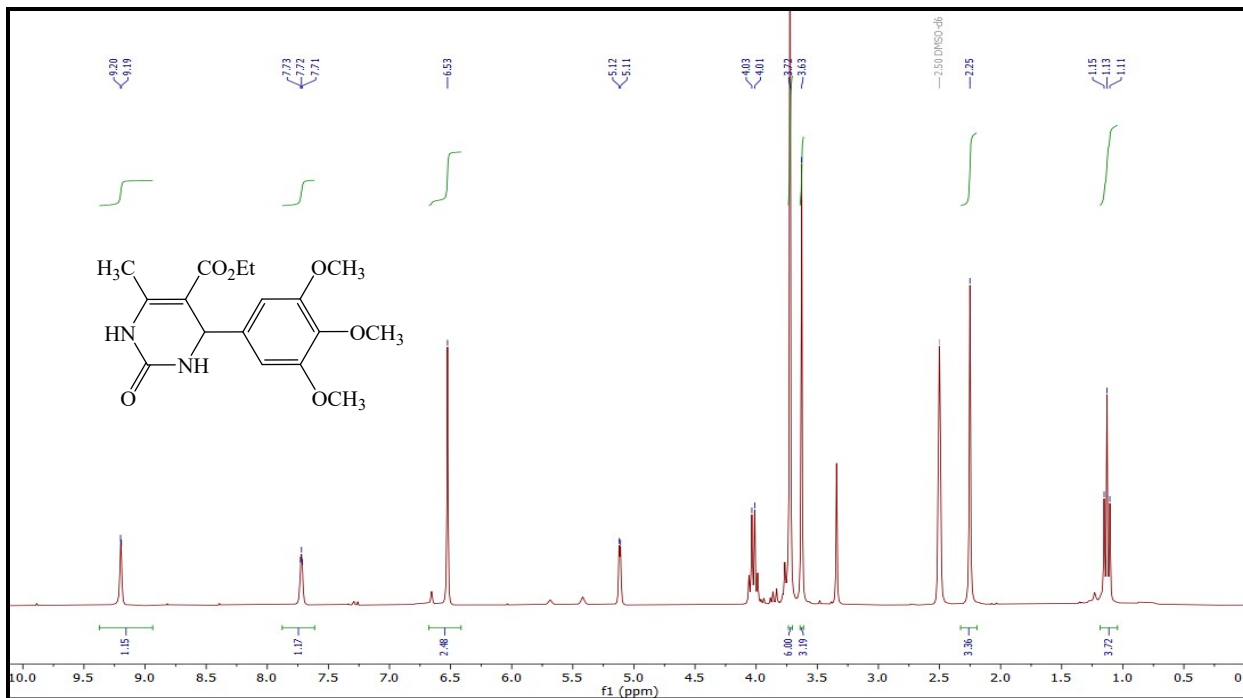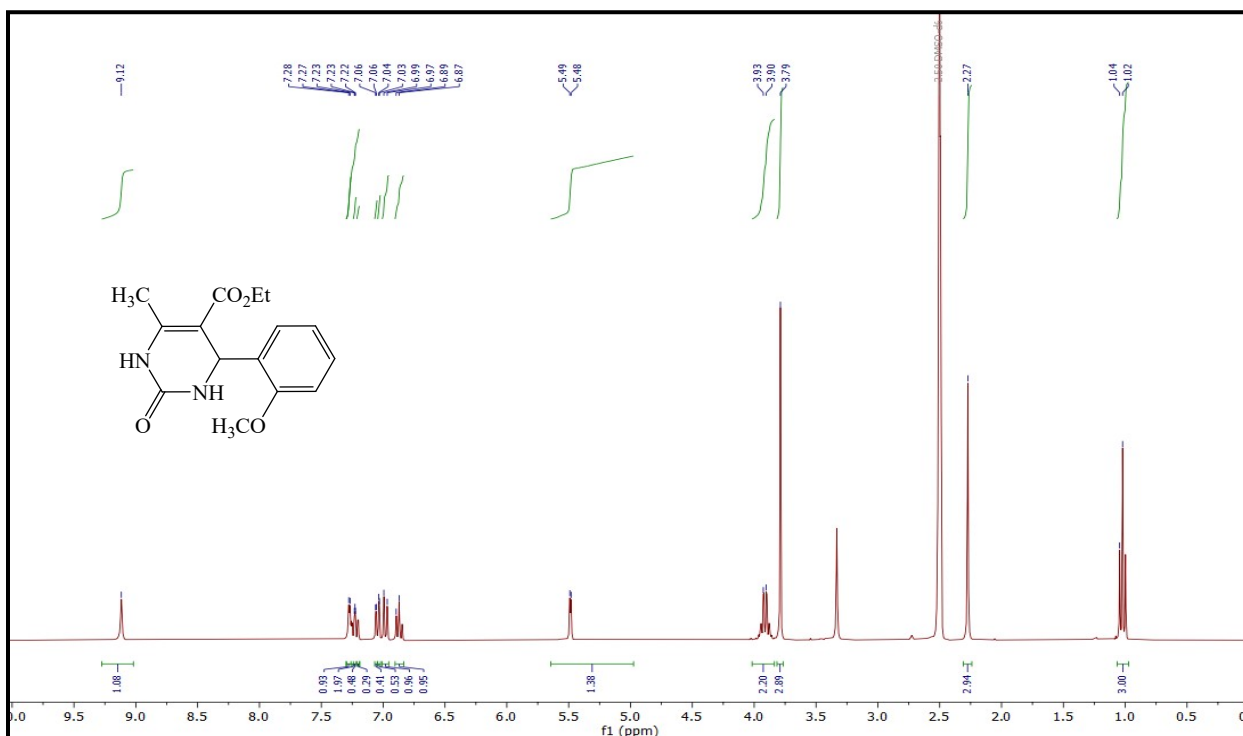

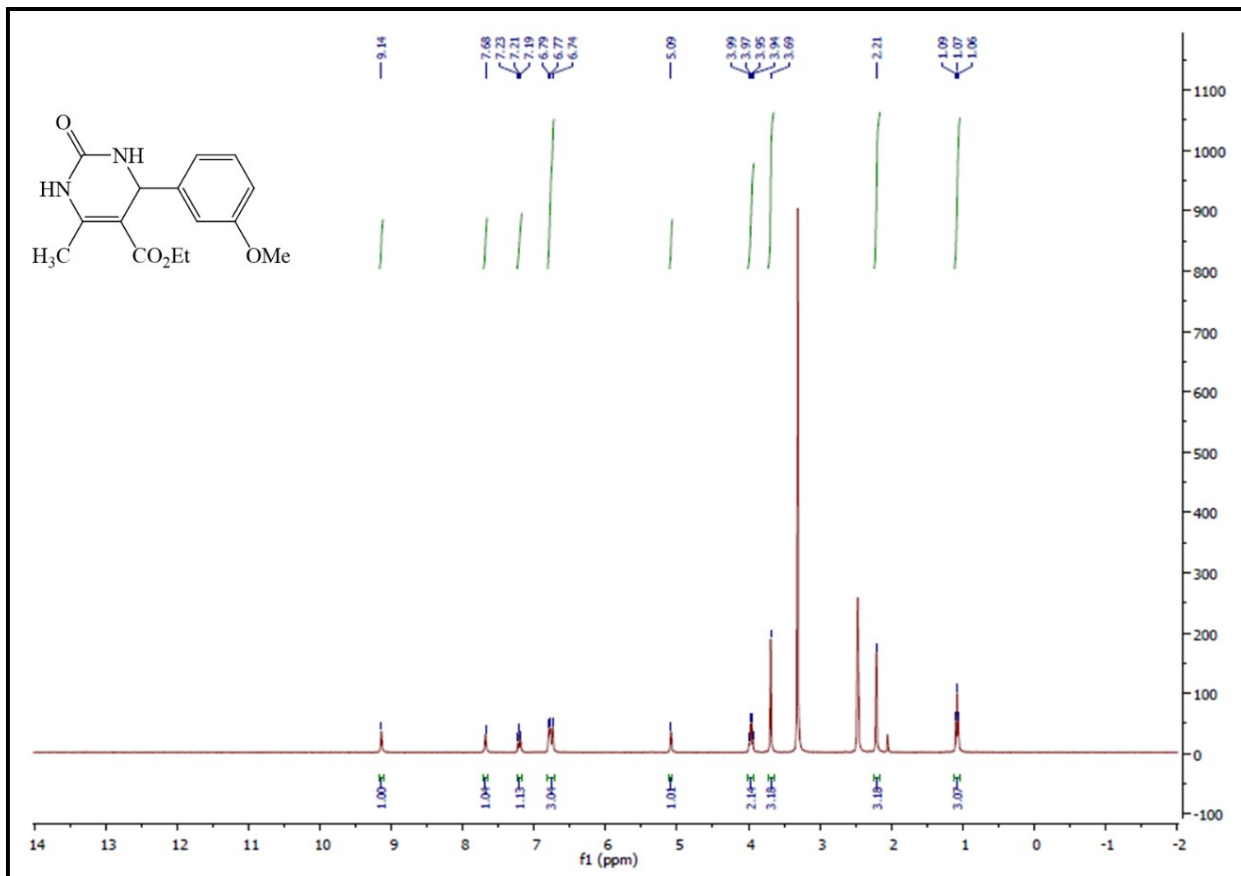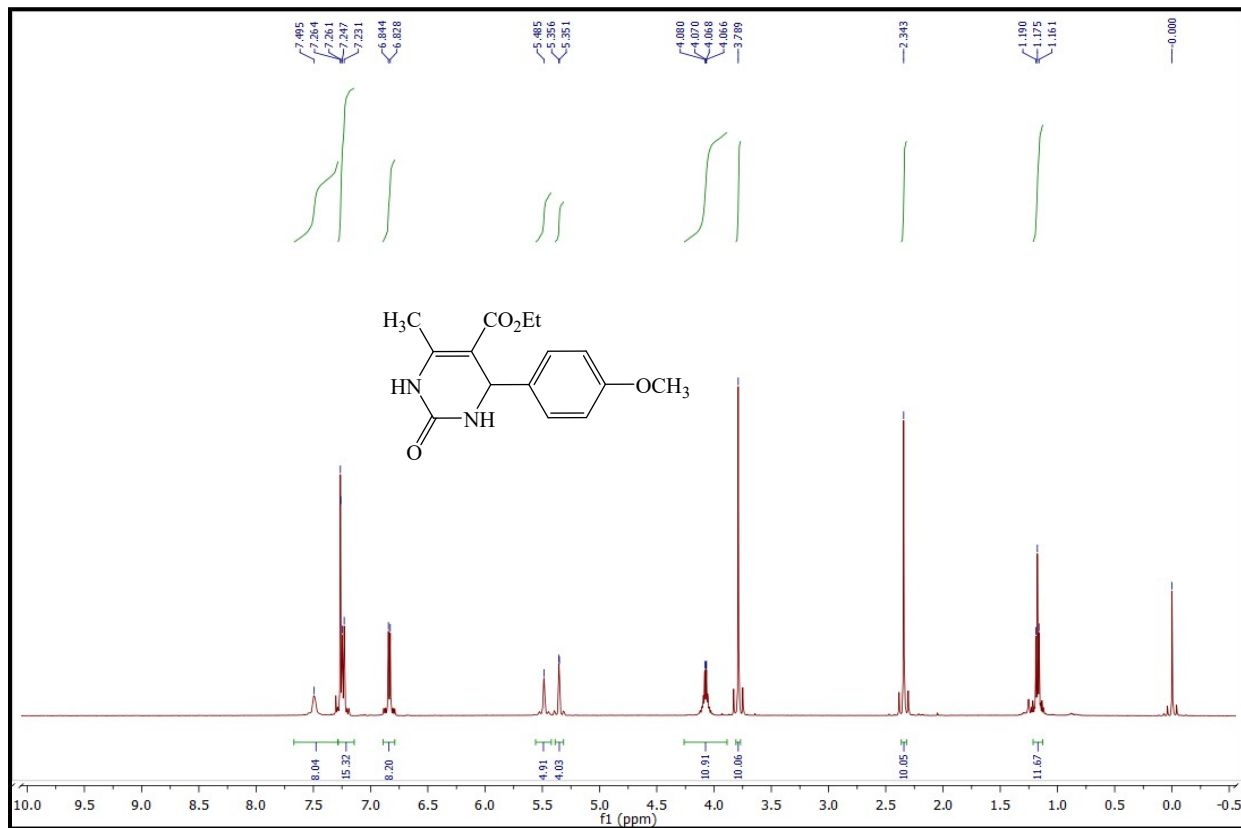

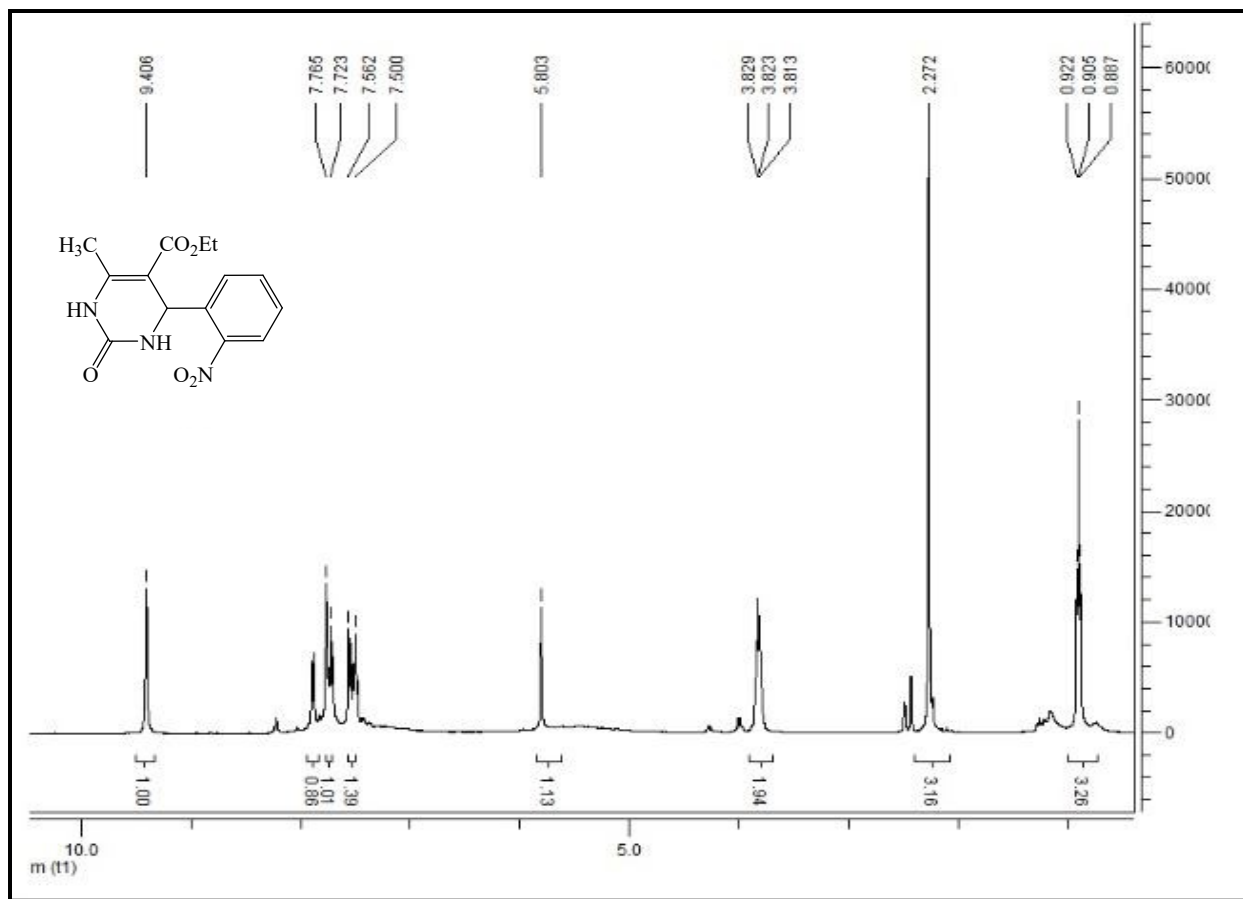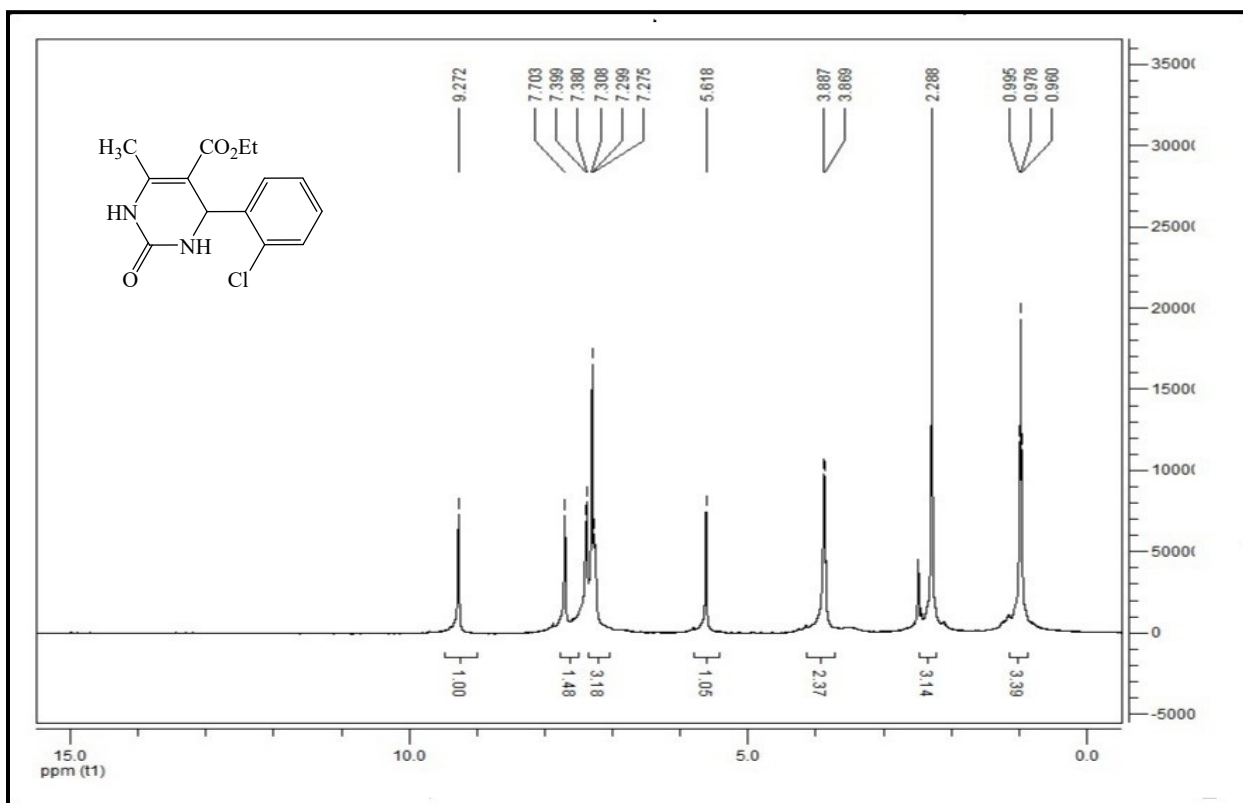

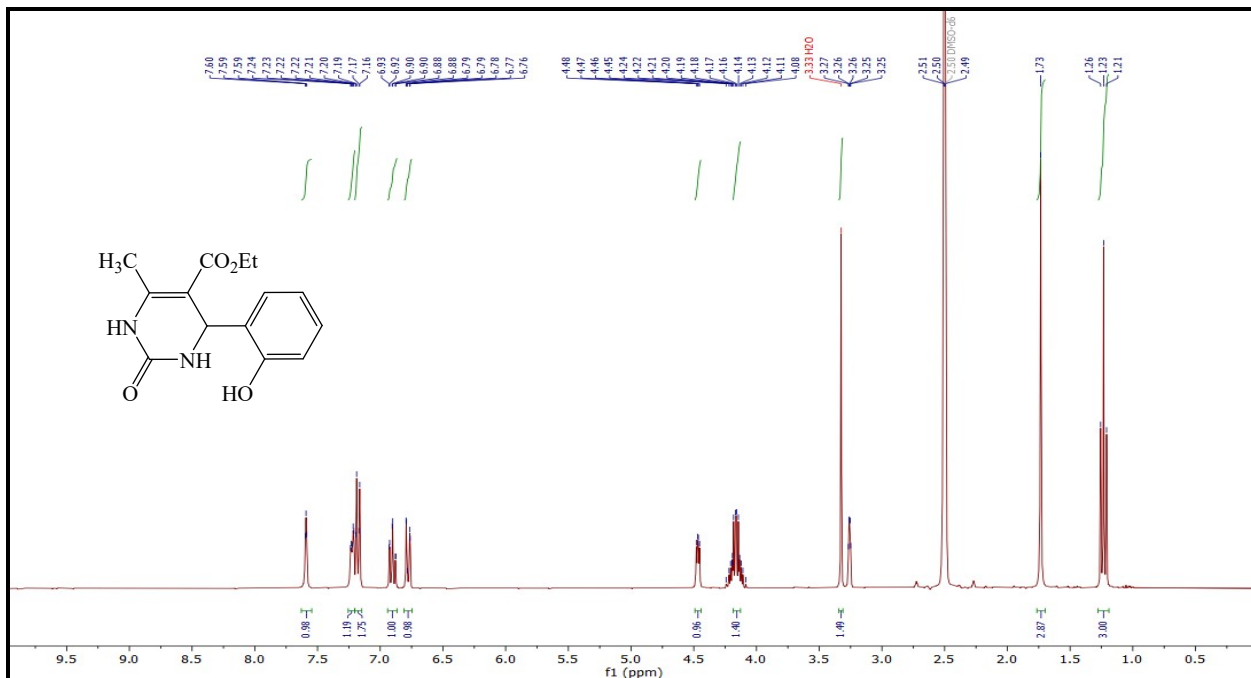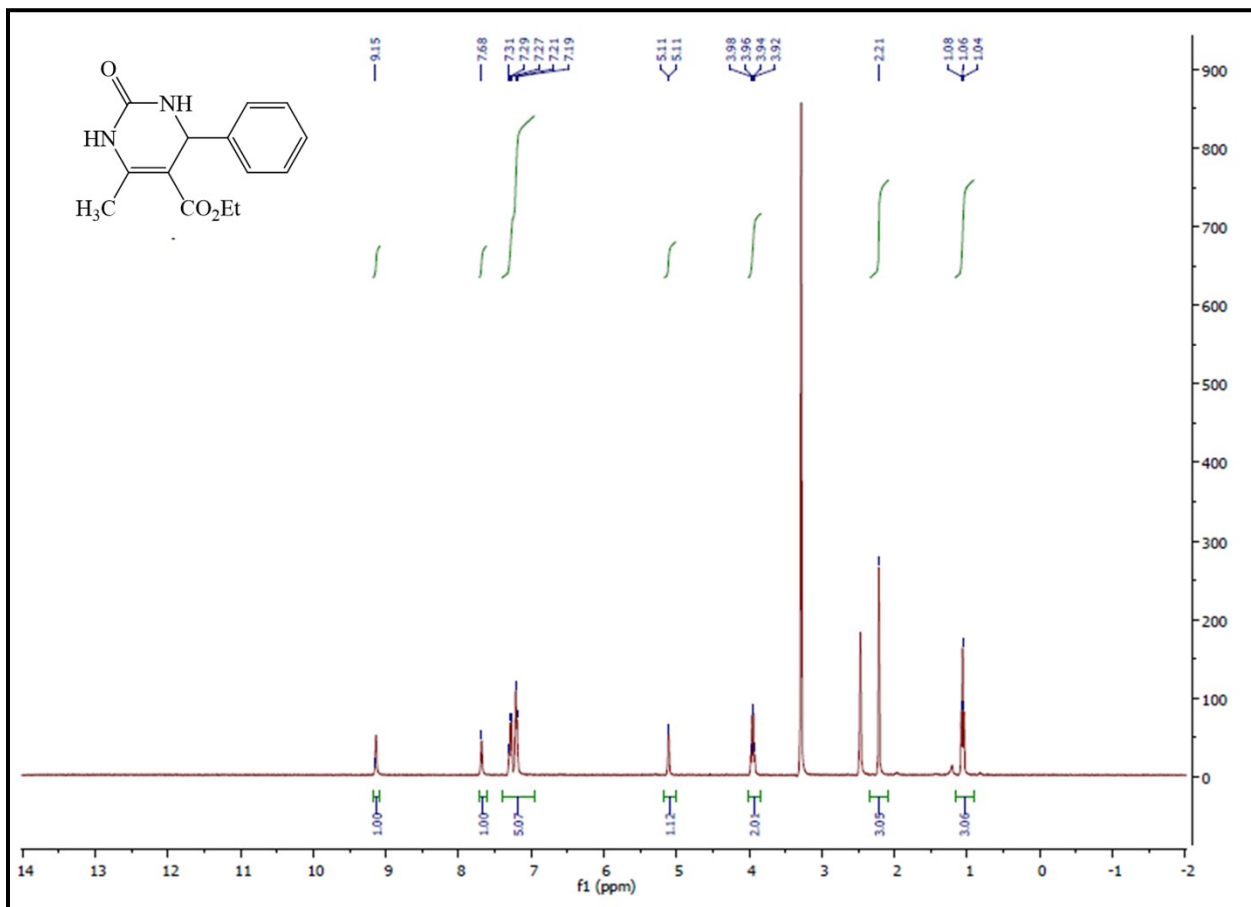



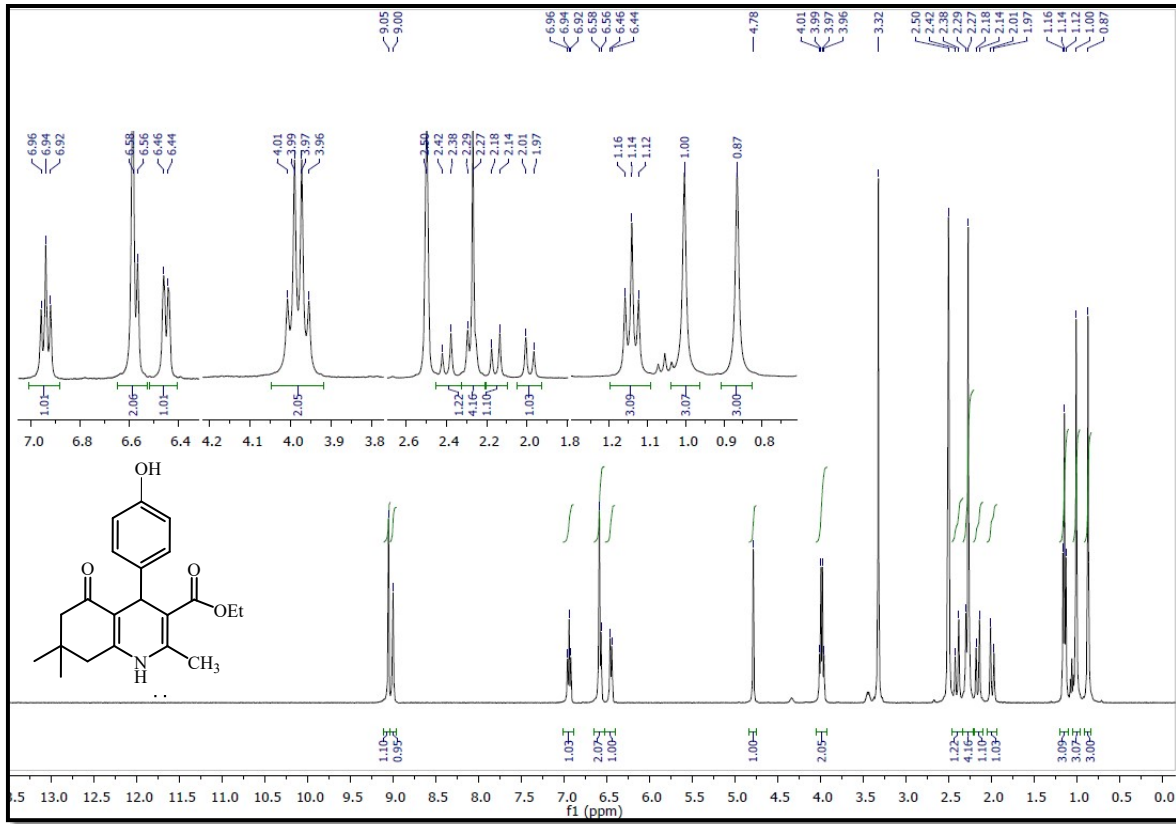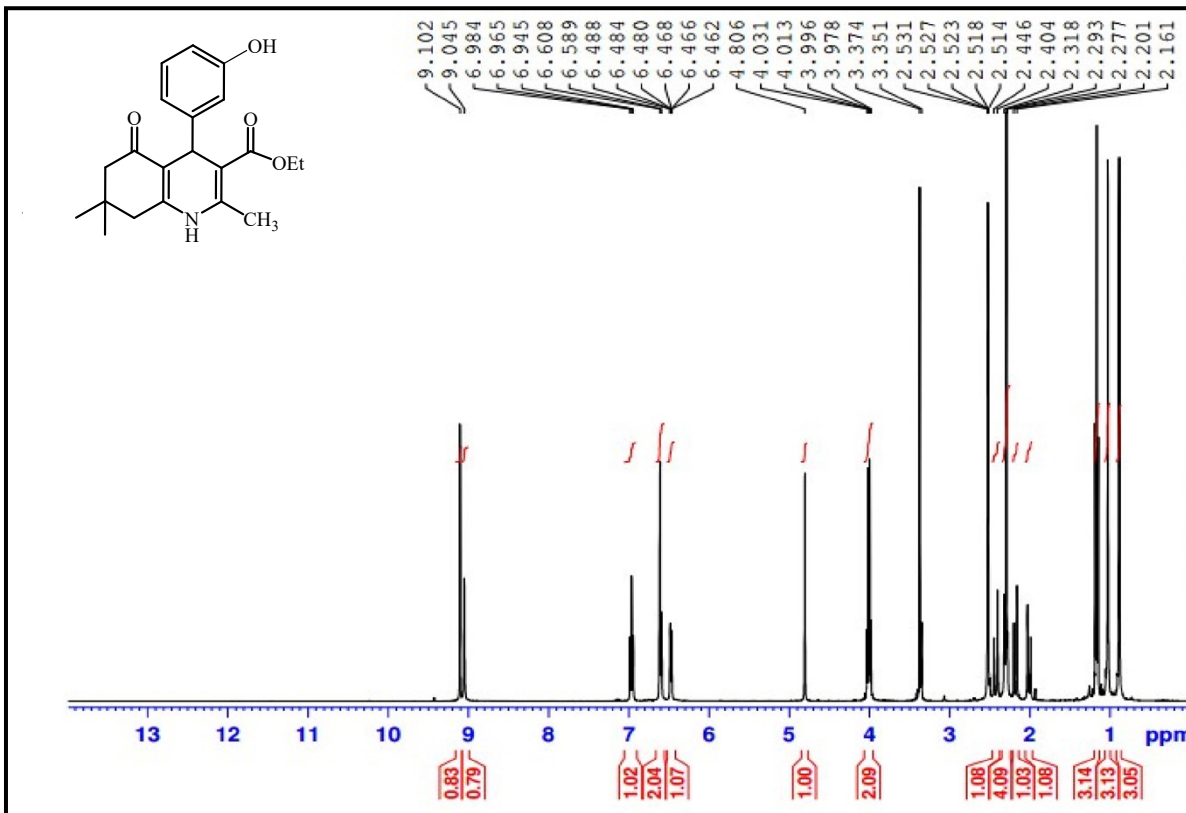

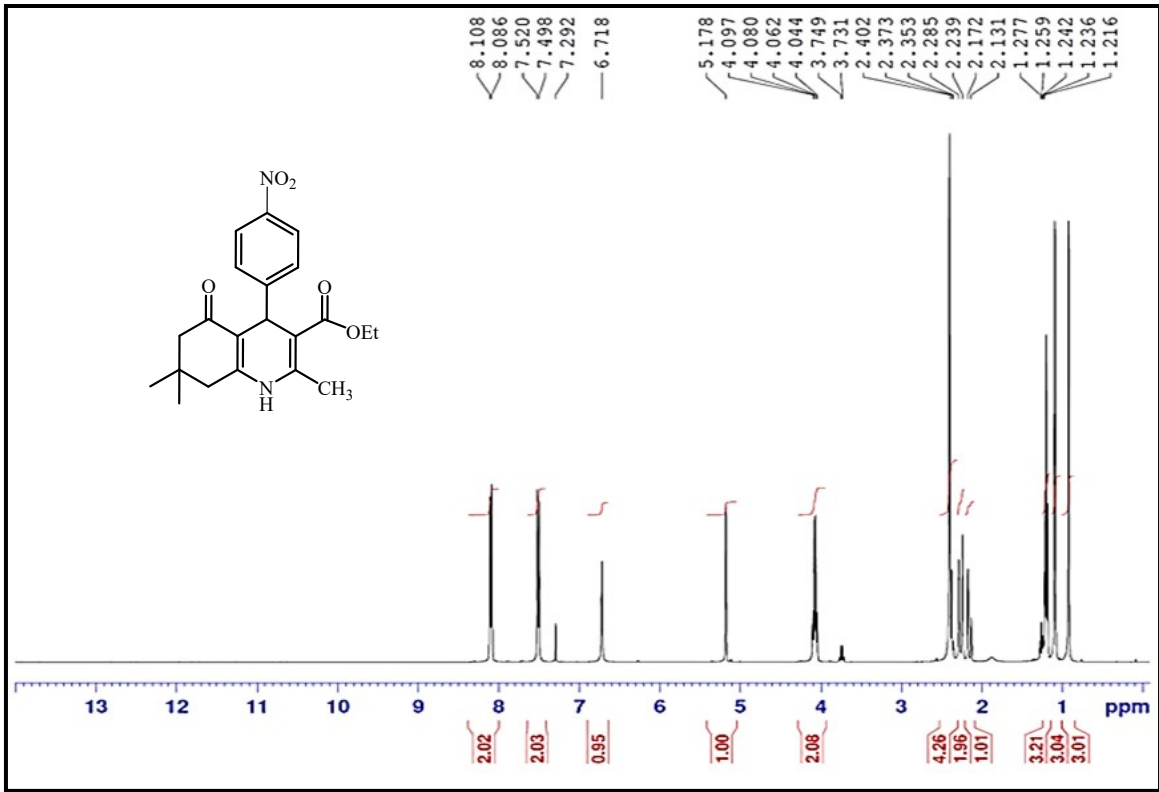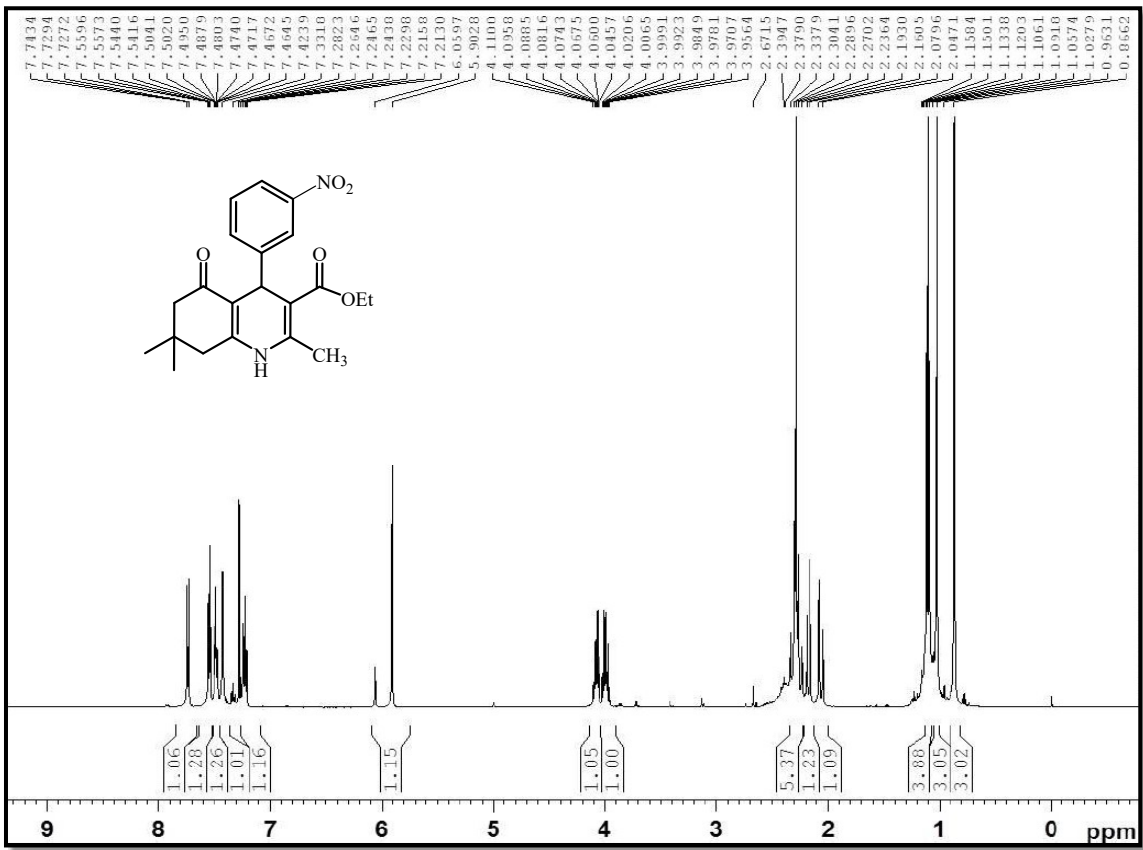

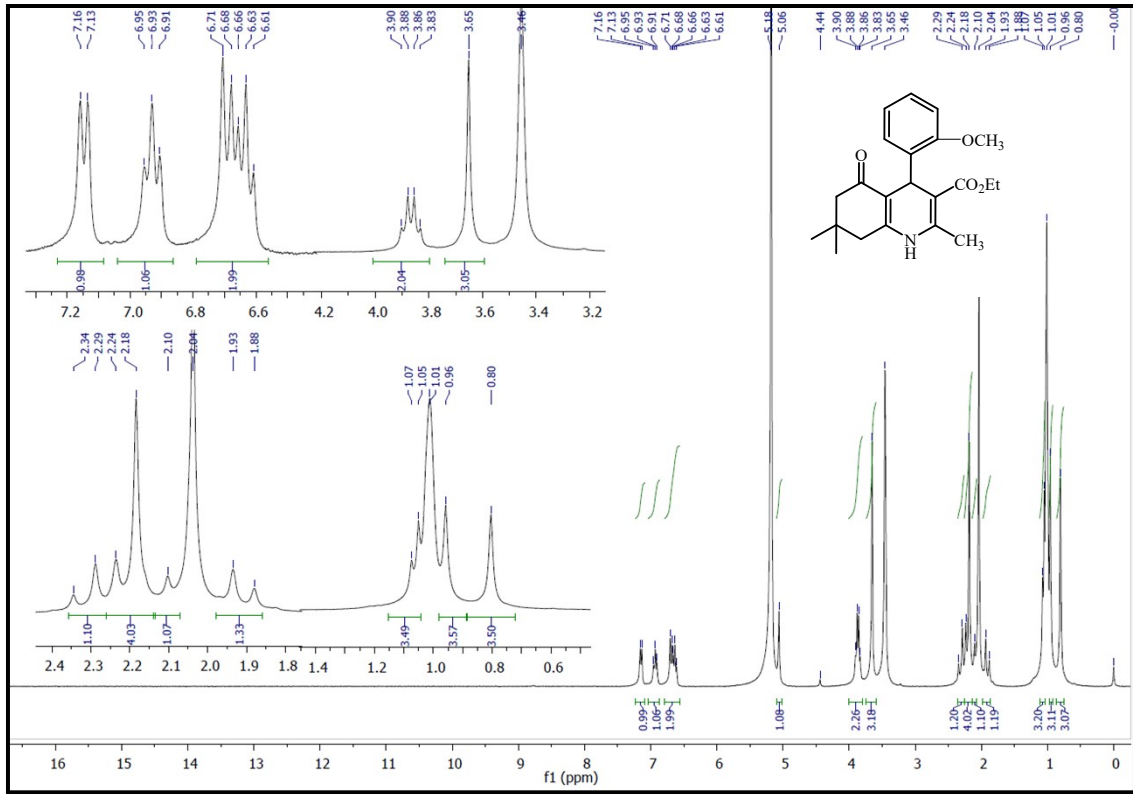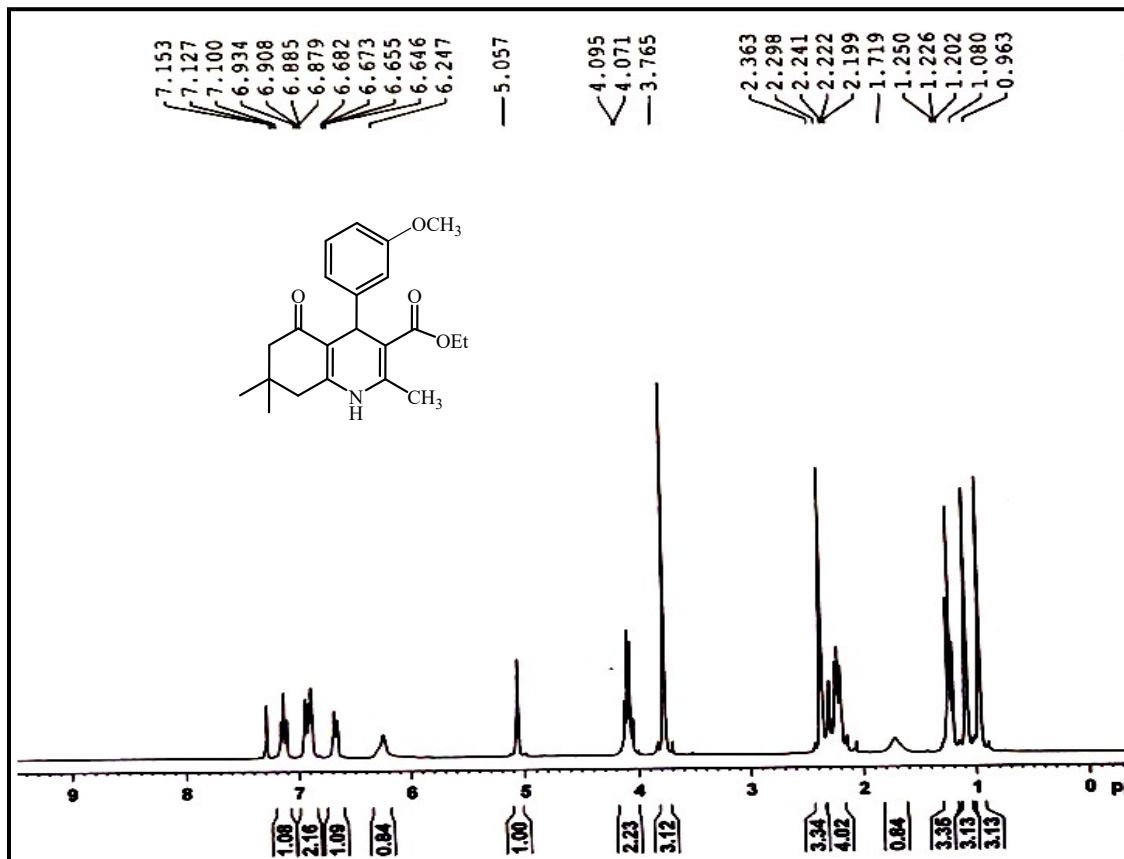

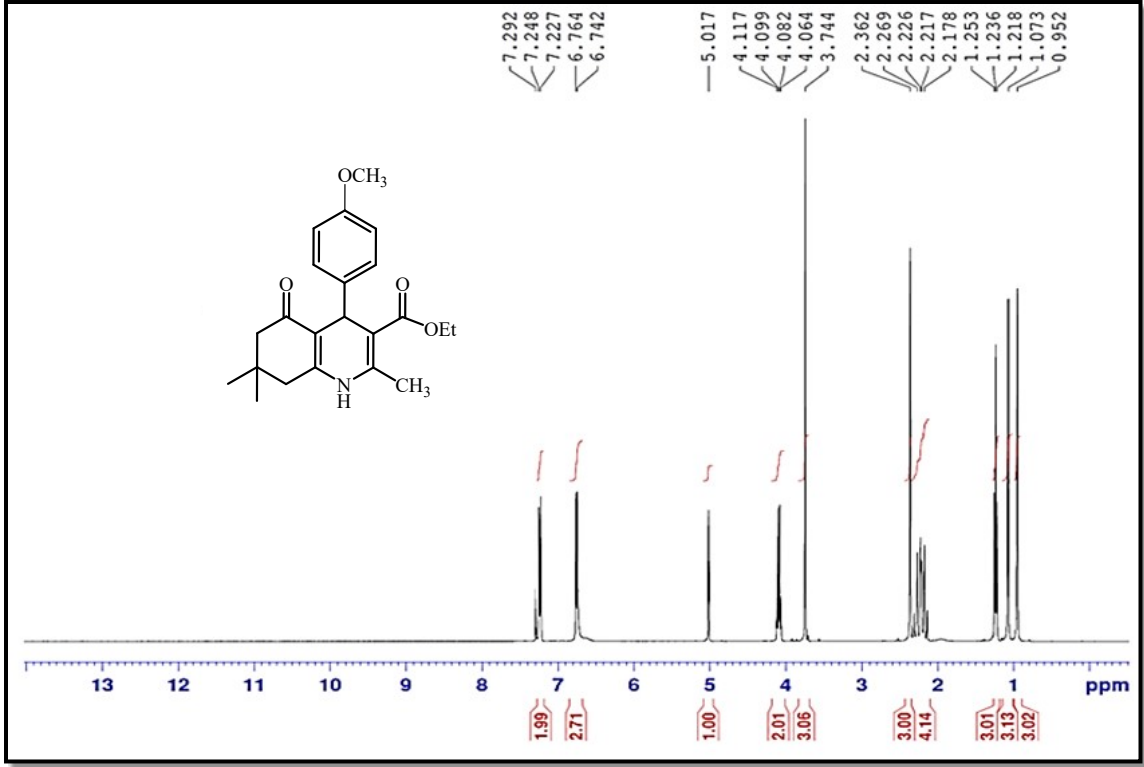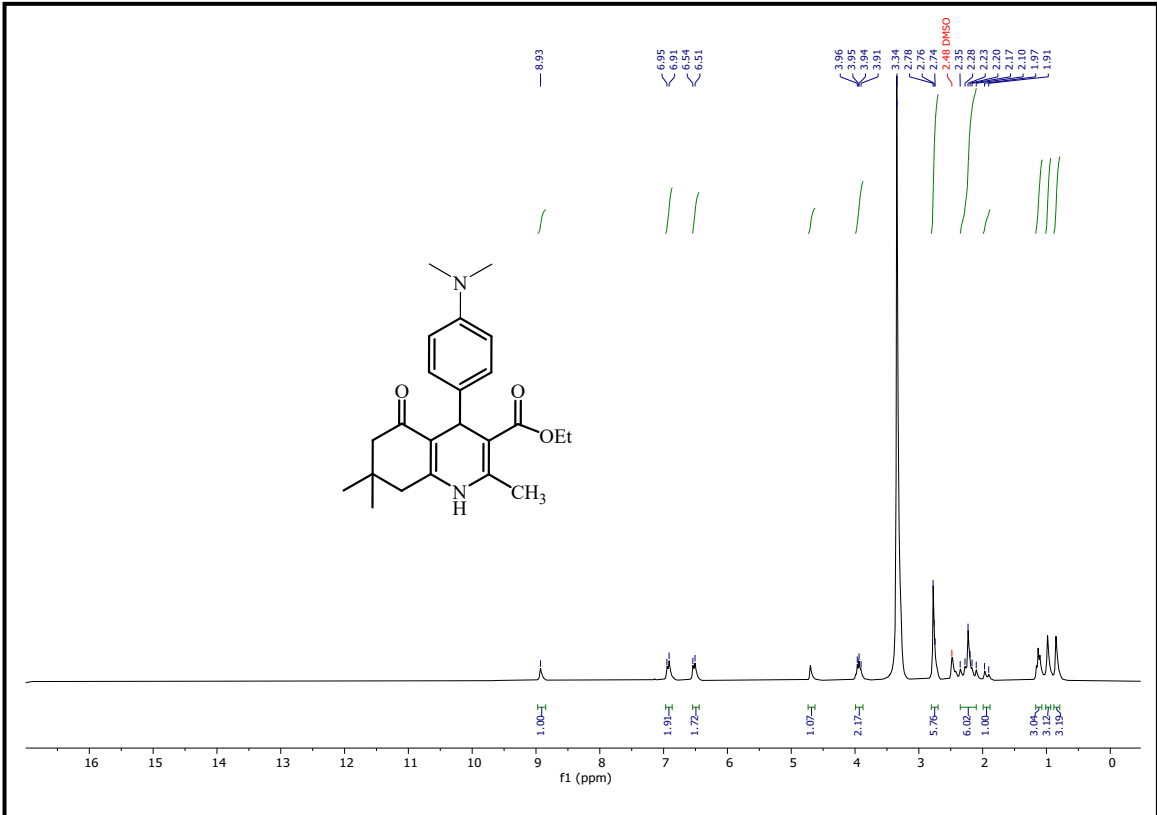

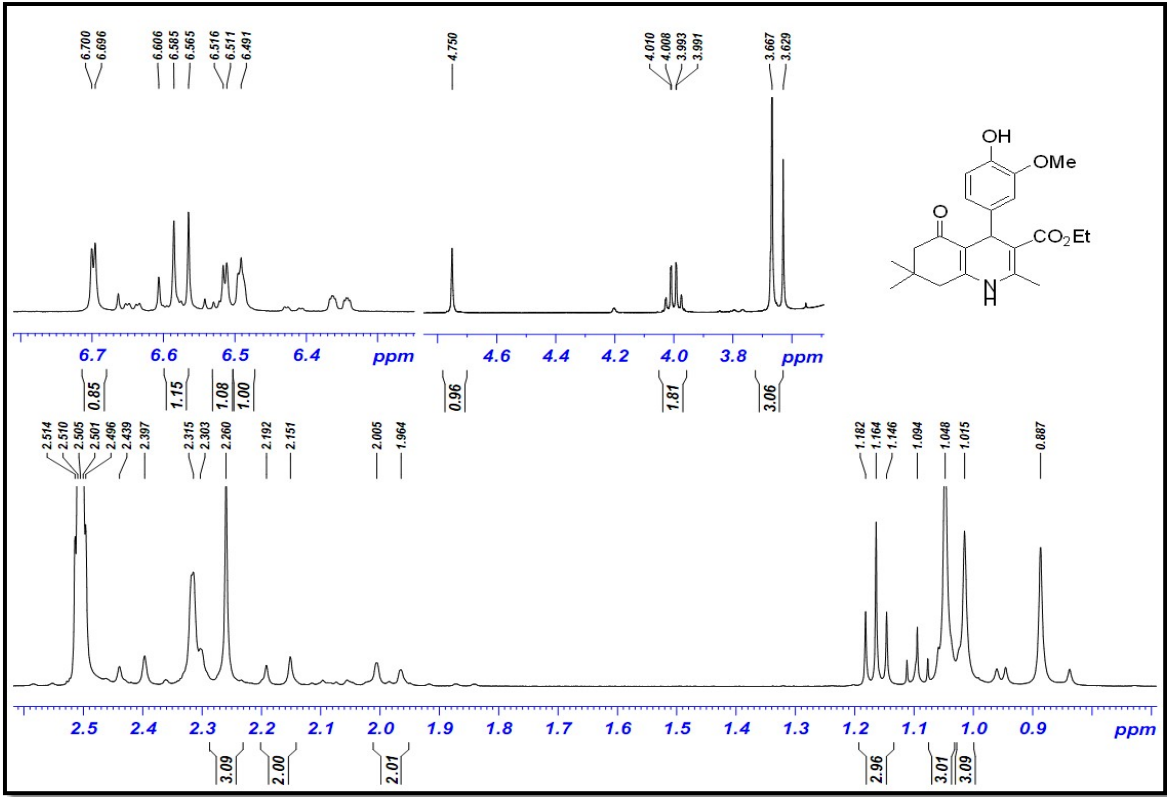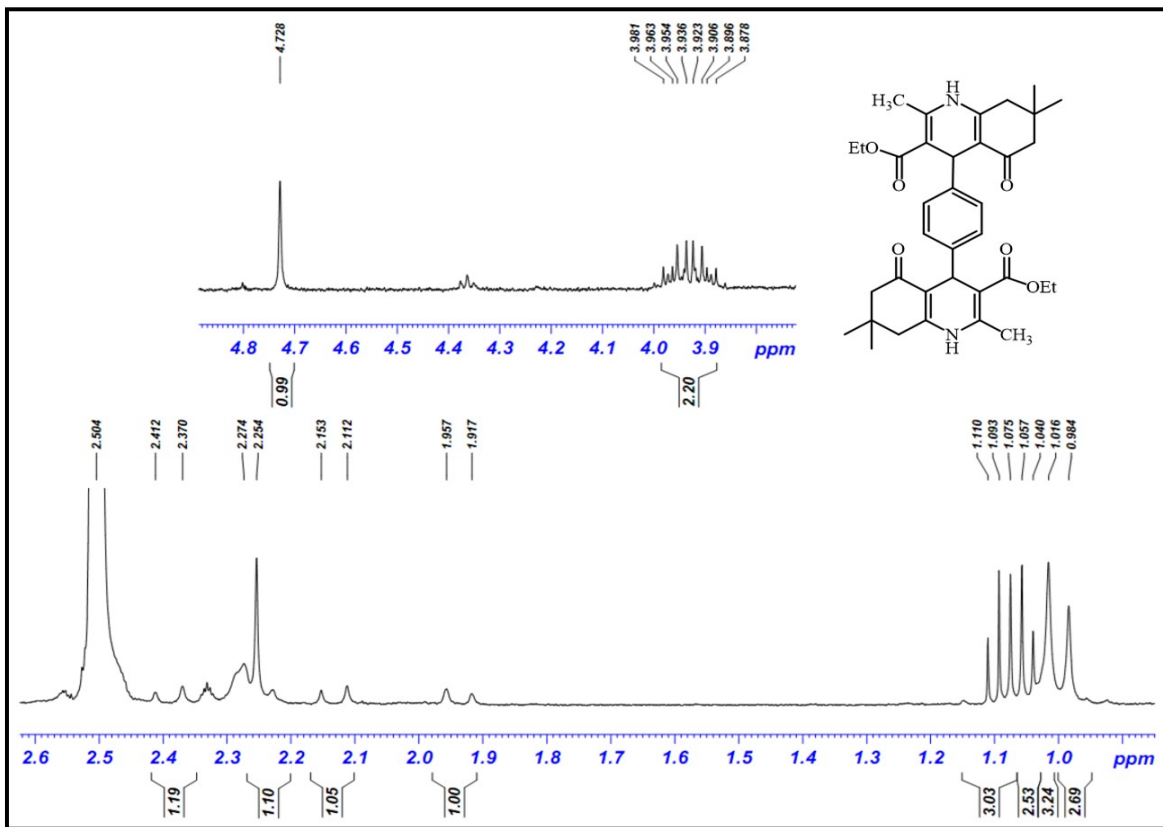

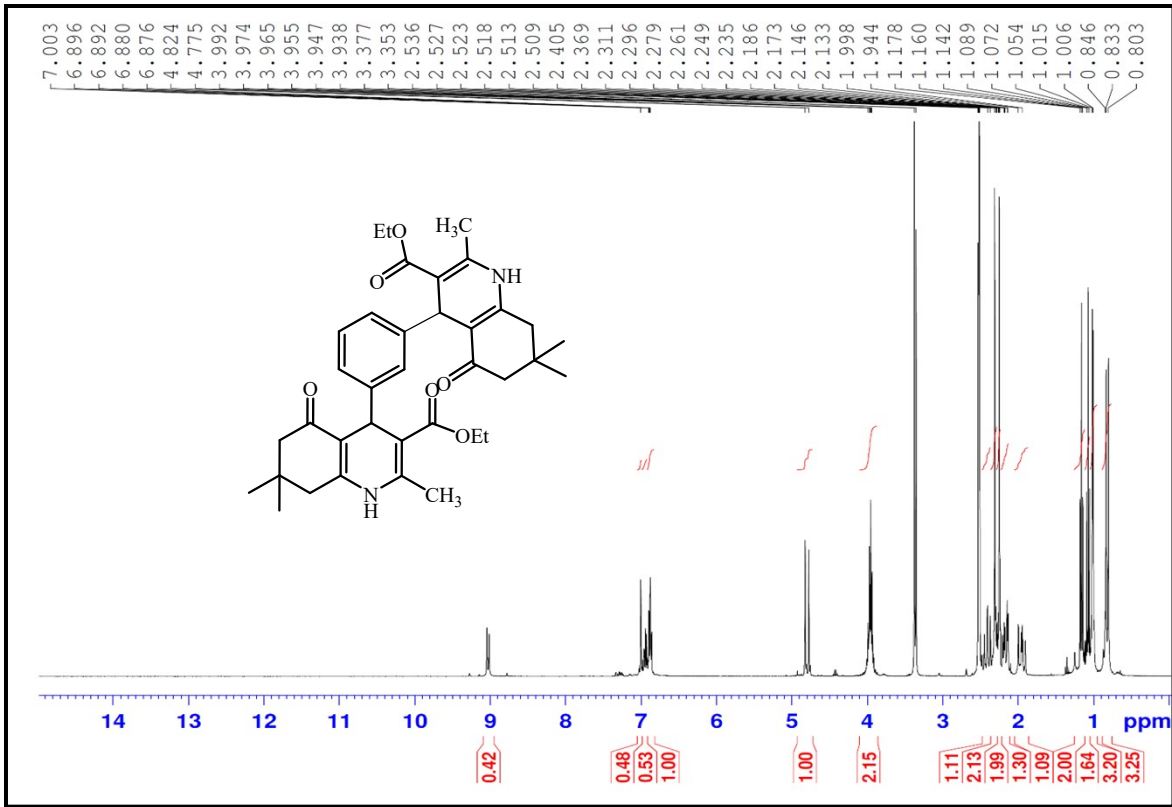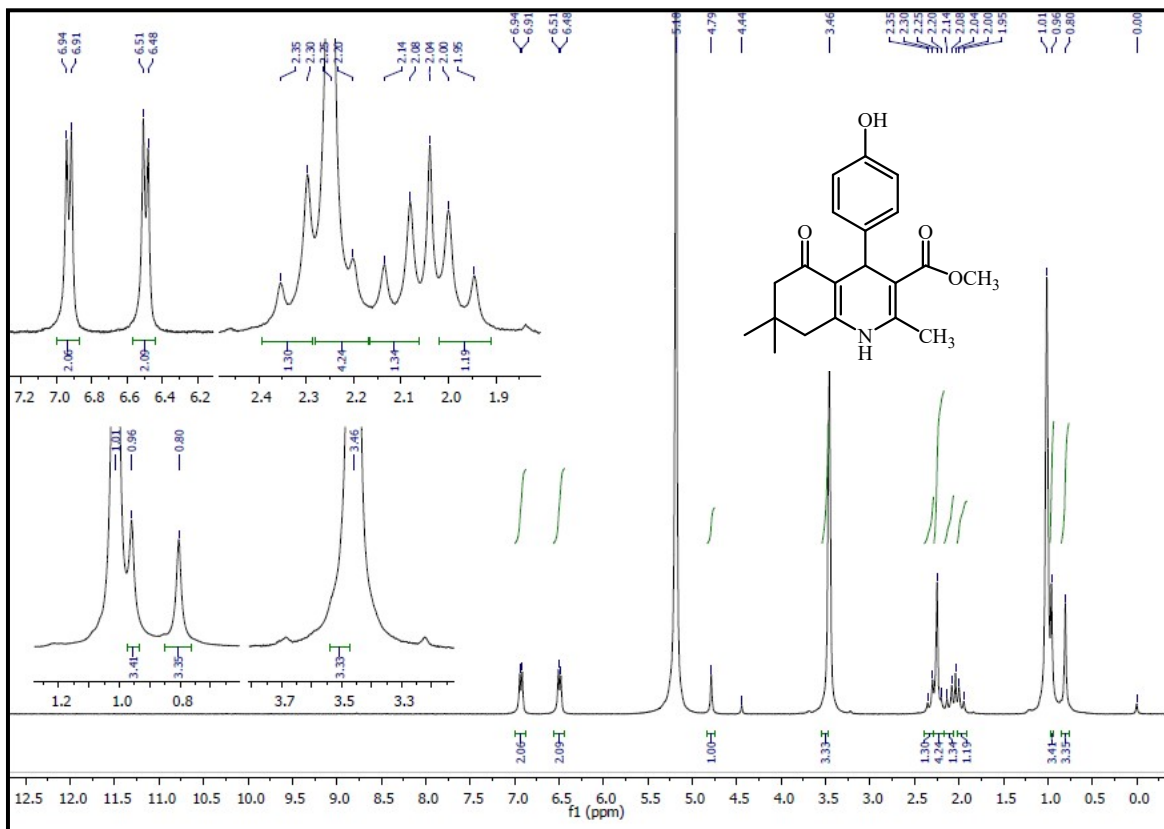

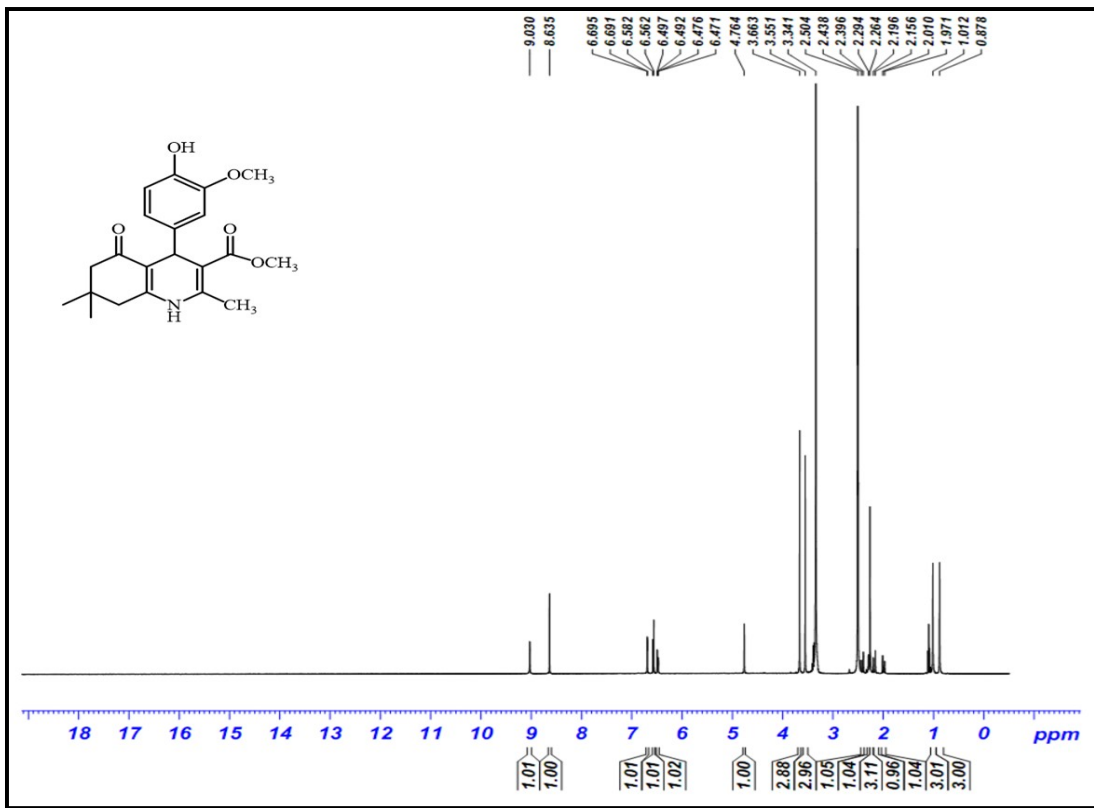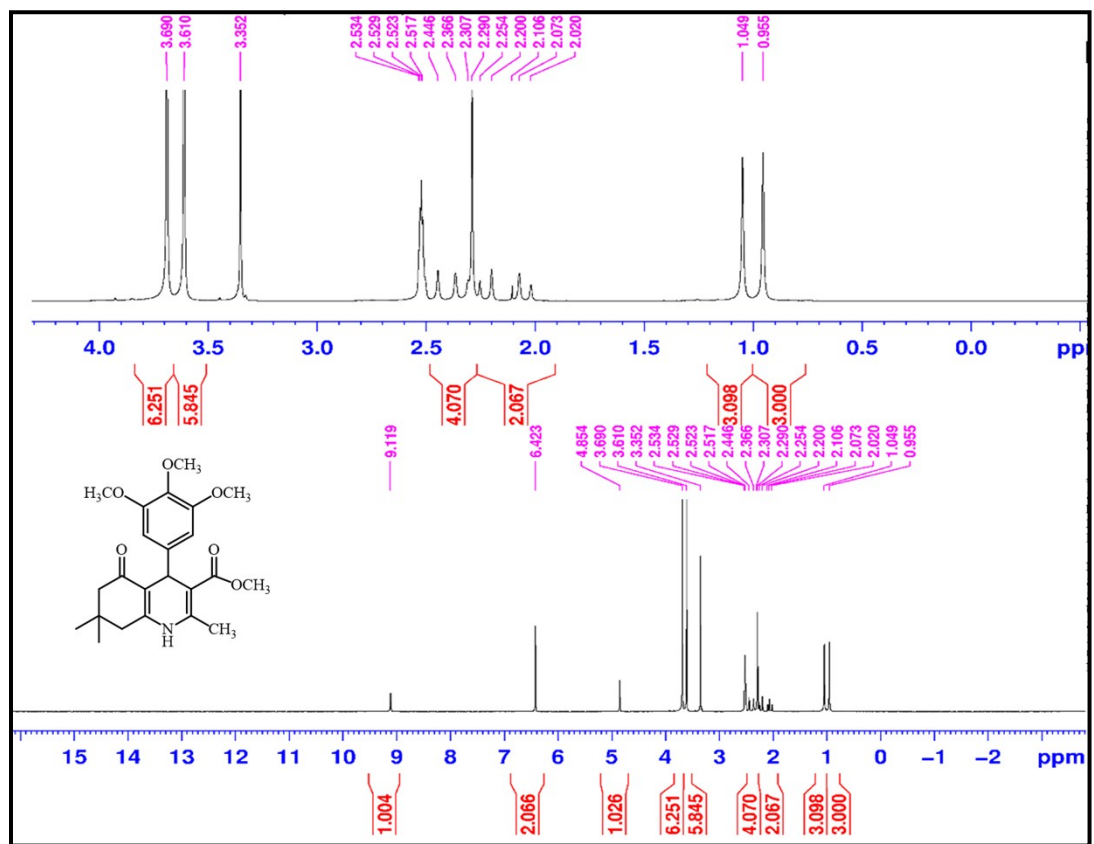



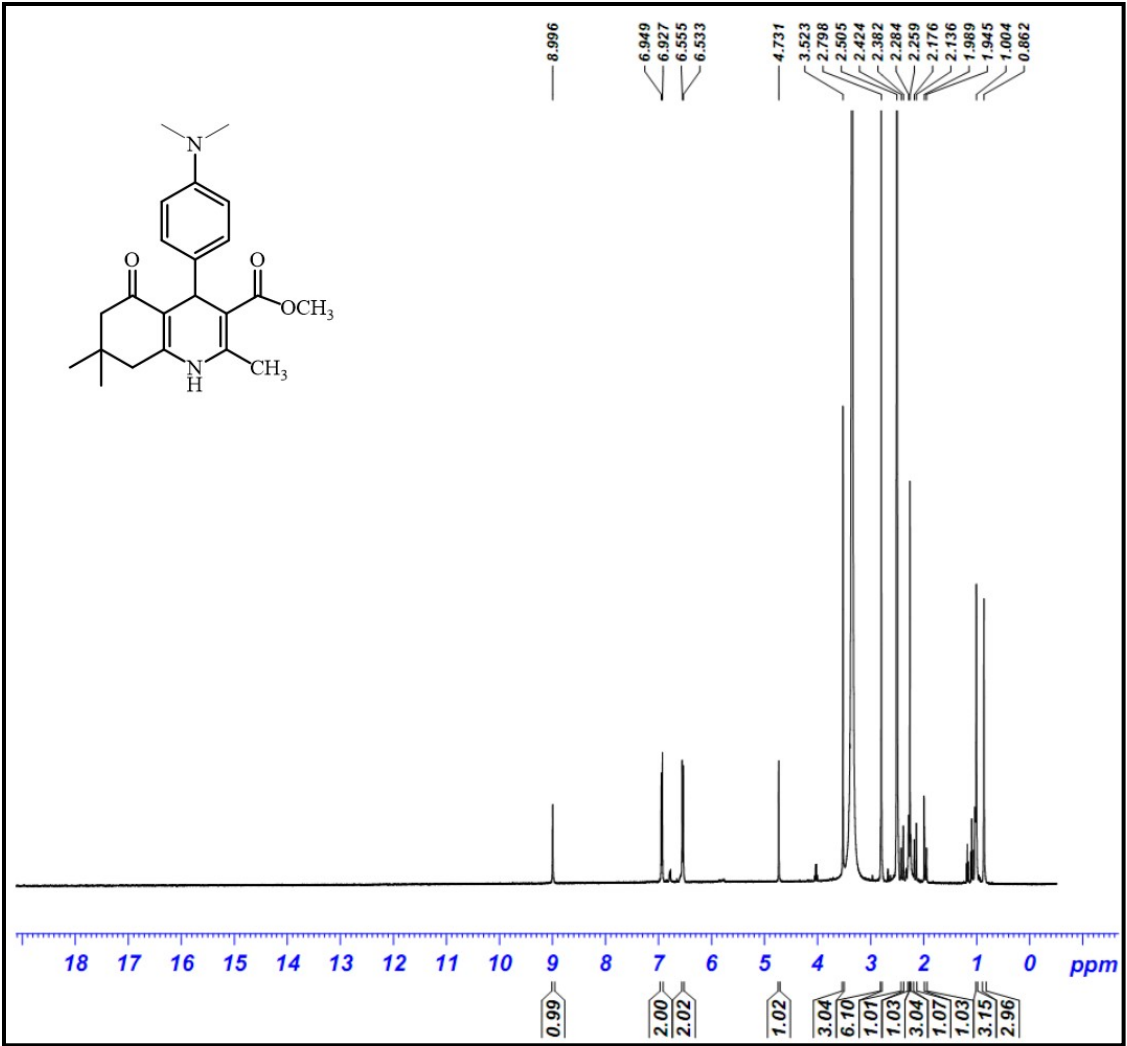

Supplement: d3ra07366a1.pdf [file d3ra07366a1.pdf]
